# Supplementary material
Source: ML conference proceedings conference paper supplement (https://openaccess.thecvf.com/content/CVPR2022/html/Jin_Eigenlanes_Data-Driven_Lane_CVPR_2022_paper.html)
Supplement: Supplementary file 1 [file Jin_Eigenlanes_Data-Driven_Lane_CVPR_2022_supplemental.zip]

Archive with 2 entries (2 files):
- 06918-supp.mp4
- 06918-supp.pdf
